# Supplementary material for: Antisense oligonucleotides against microRNA-21 reduced the proliferation and migration of human colon carcinoma cells
Source: Springer Nature journal article supplement (doi:10.1186/s12935-015-0228-7), 2015-07-31
Supplement: MOESM1 [file 9760778]

**Supplementary data figure 1**

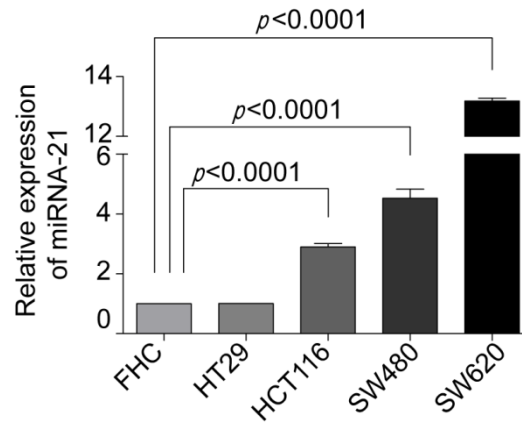

**Supplementary data figure 1. The relative expression of miR-21 in colon carcinoma cells.** Three human colon carcinoma cells and normal colonic cells FHC were culture in 96-well plate. Then, the relative expression of miR-21 was determined by real-time PCR assay. \* $p < 0.05$ .
