# Supplementary material for: Antisense oligonucleotides against microRNA-21 reduced the proliferation and migration of human colon carcinoma cells
Source: Springer Nature journal article supplement (doi:10.1186/s12935-015-0228-7), 2015-07-31
Supplement: MOESM2 [file 9760778]

## Supplementary data figure 2

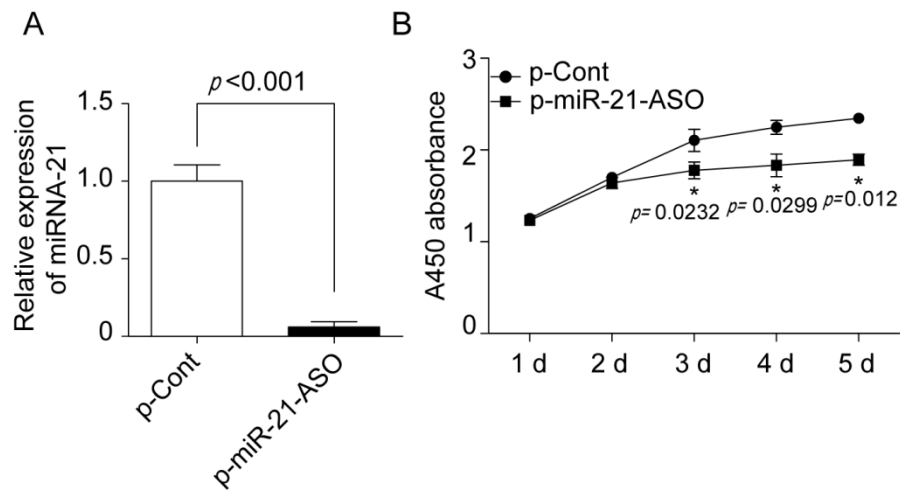

**Supplementary data figure 2. The effect of miR-21 ASO on the growth of human colon carcinoma cell line SW620 cells in vitro.** Human colon carcinoma cell line SW620 cells were transiently transfected with p-miR-21-ASO or p-Cont (5ug). (A) 48h later, the relative expression of miR-21 was analyzed by real-time PCR assay. (B) The growth of cells was determined by CCK-8 assay at indicated tie point. One representative of three experiments is shown. \* $p < 0.05$ .
